# Supplementary material
Source: publisher figshare collection journal article supplement (https://adisjournals.figshare.com/ndownloader/files/35052418)
Supplement: Supplementary file 1 [file 35052418]

## Nivolumab Plus Relatlimab: Adis Evaluation

### Key Points

- A fixed-dose combination of nivolumab (a PD-1 inhibitor) and relatlimab (a LAG-3 blocking antibody) is being developed by Bristol Myers Squibb for the treatment of advanced cancer
- Received its first approval on 18 March 2022 in the USA
- Approved for use in adult patients and paediatric patients aged  $\geq 12$  years who weigh  $\geq 40$  kg with unresectable or metastatic melanoma

### Summary

Nivolumab plus relatlimab (nivolumab and relatlimab-rmbw; Opdualag™) is a fixed-dose, combination immunotherapy treatment being developed by Bristol Myers Squibb for the treatment of multiple types of advanced cancers.

Both drugs are immunoglobulin G4 (IgG4) monoclonal antibodies developed to target immune checkpoints, with nivolumab targeting the programmed cell death protein 1 (PD-1) receptor and relatlimab being a newly developed, first-in-class drug targeting the lymphocyte-activation gene 3 (LAG-3) protein.

In March 2022, nivolumab plus relatlimab received its first approval in the USA for the treatment of unresectable or metastatic melanoma in adult patients and paediatric patients aged  $\geq 12$  years who weigh  $\geq 40$  kg.

This summary represents the opinions of the author. For a full list of declarations, including funding and author disclosure statements, please see the full text online. © Springer Nature Switzerland AG 2022.
